# Supplementary material for: Gene Therapy for Liver Cancers: Current Status from Basic to Clinics
Source: Cancers (Basel). 2019 Nov 25;11(12):1865. doi: 10.3390/cancers11121865 (PMC6966544; doi:10.3390/cancers11121865)
Supplement: Supplementary file 1 [file cancers-11-01865-s001.pdf]

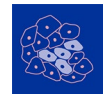

# Gene Therapy for Liver Cancers: Current Status from Basic to Clinics

Kenya Kamimura \*, Takeshi Yokoo, Hiroyuki Abe, and Shuji Terai

Supplementary Table S1. Full summary of ongoing clinical trials for gene therapy for liver cancers.

| No | NCT Number  | Official Title                                                                                                                                                                         | Brief Summary                                                                                                                                                                                                                                                         | Types of Liver Tumors                            | Gene/<br>Antigen | Types of Gene                | Vectors or Cells                                                                                  | Intervention                             | Route of Administration                  | Phase | Enrollment | Current Status and Results                                            | Ref.     |
|----|-------------|----------------------------------------------------------------------------------------------------------------------------------------------------------------------------------------|-----------------------------------------------------------------------------------------------------------------------------------------------------------------------------------------------------------------------------------------------------------------------|--------------------------------------------------|------------------|------------------------------|---------------------------------------------------------------------------------------------------|------------------------------------------|------------------------------------------|-------|------------|-----------------------------------------------------------------------|----------|
| 1  | NCT00003147 | Phase I Study of Percutaneous Injections of Adeno-Virus p53 Construct (ADENO-p53) for Hepatocellular Carcinoma                                                                         | This study aimed to study the effectiveness of gene therapy with the p53 gene in treating patients who have cancer of the liver that cannot be surgically removed. Inserting the p53 gene into a person's tumor may improve the body's ability to fight liver cancer. | HCC                                              | p53              |                              | Adenoviral Vector                                                                                 | Ad5CMV-p53 gene                          | Percutaneous injection                   | 1     | 30         | Terminated No results available                                       |          |
| 2  | NCT01071941 | rRp450-Phase I Trial in Liver Metastases and Primary Liver Tumors                                                                                                                      | This study aimed to determine the safety of rRp450 and the highest dose of this agent that can be given to people safely.                                                                                                                                             | Primary Liver Cancers                            | Oncolytic Virus  | Oncolytic Virus              | Herpes simplex virus 1                                                                            | rRp450                                   | Hepatic arterial injection               | 1     | 40         | Recruiting No results available Estimated Completion Date: July, 2020 |          |
|    |             |                                                                                                                                                                                        |                                                                                                                                                                                                                                                                       | Metastatic Liver Tumors                          |                  |                              |                                                                                                   |                                          |                                          |       |            |                                                                       |          |
| 3  | NCT00844623 | Phase I Clinical Trial of Gene Therapy for Hepatocellular Carcinoma by Intratumoral Injection of TK99UN (An Adenoviral Vector Containing the Thymidine Kinase of Herpes Simplex Virus) | The study aimed to evaluate the intratumoral injection of defective adenovirus containing HSVtk (the thymidine kinase of herpes simplex virus), in patients with advanced HCC that were not amenable to curative therapy.                                             | HCC                                              | HSVtk            | Suicide                      | Adenoviral vector                                                                                 | TK99UN (adenoviral vector containing TK) | Intratumoral injection                   | 1     | 10         | Completed Results partly reported.                                    | [73,124] |
| 4  | NCT02202564 | Preliminary Results for the Double-dose Adenovirus-mediated Adjuvant Therapy Improving Outcome of Liver Transplantation in Patients with Advanced Hepatocellular Carcinoma             | This study aimed to clarify the anti-tumor effect of adjuvant therapy of ADV-TK following liver transplantation for the patients with tumors >5 cm in diameter, regardless of involvement in the intrahepatic and extrahepatic portal branches.                       | HCC                                              | HSVtk            | Suicide                      | Adenoviral vector                                                                                 | LT ADV-TK ganciclovir                    | Intravenous infusion                     | 2     | 81         | Completed No results reported to date                                 |          |
| 5  | NCT02561546 | A Phase II Study to Investigate Preliminary Efficacy Using p53 Gene Therapy for Treatment of Diabetes Concurrent with Hepatocellular Carcinoma                                         | This study aimed to investigate preliminary efficacy of p53 gene therapy in treatment of diabetes concurrent with HCC.                                                                                                                                                | HCC                                              | p53              | Tumor suppressor             | Recombinant adenoviral vector                                                                     | p53 gene therapy TAE                     | Hepatic arterial injection following TAE | 2     | 40         | Not yet recruiting                                                    |          |
| 6  | NCT00300521 | Liver Transplantation With ADV-TK Gene Therapy Improves Survival in Patients with Advanced Hepatocellular Carcinoma                                                                    | This study aimed to examine the effect of ADV-TK gene therapy combined with liver transplantation in patients with intermediate or advanced HCC.                                                                                                                      | HCC                                              | HSVtk            | Suicide                      | Adenoviral vector                                                                                 | ADV-TK                                   | Intravenous infusion                     | 2     | 40         | Completed No results reported to date                                 |          |
| 7  | NCT00004178 | Phase I Study of T Cells Modified with Chimeric AntiCEA Immunoglobulin-T Cell Receptors (IgTCR) in Adenocarcinoma                                                                      | This study aimed to examine the effectiveness of ex vivo gene therapy in treating patients who have cancer that has not responded to previous therapy.                                                                                                                | Primary Liver Cancers<br>Metastatic Liver Tumors | CEA              | Tumor-related Protein Coding | T Cells Modified with Chimeric Anti-CEA Immunoglobulin-T Cell Receptors (IgTCR) in Adenocarcinoma | Therapeutic autologous lymphocytes       | Intravenous infusion                     | 1     |            | Completed No results reported to date                                 |          |

|    |             |                                                                                                                                                                                                                                                                                 |                                                                                                                                                                                                                                                                                                                                         |                                 |                                                                                         |                              |                                                      |                                                                       |                                          |     |     |                                                                             |               |
|----|-------------|---------------------------------------------------------------------------------------------------------------------------------------------------------------------------------------------------------------------------------------------------------------------------------|-----------------------------------------------------------------------------------------------------------------------------------------------------------------------------------------------------------------------------------------------------------------------------------------------------------------------------------------|---------------------------------|-----------------------------------------------------------------------------------------|------------------------------|------------------------------------------------------|-----------------------------------------------------------------------|------------------------------------------|-----|-----|-----------------------------------------------------------------------------|---------------|
| 8  | NCT03313596 | Multicenter Randomized Controlled Trial of Adenovirus-mediated Adjuvant Gene Therapy Improving Outcome of Liver Transplantation in Patients with Advanced Hepatocellular Carcinoma                                                                                              | This study aimed to compare the effect of liver transplantation plus suicide gene therapy versus liver transplantation only in advanced HCC.                                                                                                                                                                                            | HCC                             | HSVtk                                                                                   | Suicide                      | Adenoviral vector                                    | ADV-TK<br>LT                                                          | Intravenous infusion                     | 3   | 180 | Recruiting No results<br>available Estimated<br>Completion Date: Dec, 2019  |               |
| 9  | NCT03480152 | A Phase I/II Trial to Evaluate the Safety and Immunogenicity of a Messenger RNA (mRNA)-Based, Personalized Cancer Vaccine Against Neoantigens Expressed by the Autologous Cancer                                                                                                | This study aimed to examine the effect of mRNA-based, personalized cancer vaccine against neoantigens expressed by the autologous cancer.                                                                                                                                                                                               | Primary Liver Cancers           | mRNA containing epitopes from immunogenic neoantigens                                   | Tumor-related Protein Coding | mRNA vaccine                                         | NCI-4650, a mRNA-based, Personalized Cancer Vaccine                   | Intramuscular injection                  | 1/2 | 5   | Terminated Related results<br>partly reported                               | [159,160,161] |
|    |             |                                                                                                                                                                                                                                                                                 |                                                                                                                                                                                                                                                                                                                                         | Metastatic Liver Tumors         | mRNA containing epitopes from immunogenic predicted neoantigens                         |                              |                                                      |                                                                       |                                          |     |     |                                                                             |               |
|    |             |                                                                                                                                                                                                                                                                                 |                                                                                                                                                                                                                                                                                                                                         |                                 | mRNA containing epitopes from immunogenic mutations in tumor suppressor or driver genes |                              |                                                      |                                                                       |                                          |     |     |                                                                             |               |
|    |             |                                                                                                                                                                                                                                                                                 |                                                                                                                                                                                                                                                                                                                                         |                                 |                                                                                         |                              |                                                      |                                                                       |                                          |     |     |                                                                             |               |
| 10 | NCT01967823 | Phase II Study of Metastatic Cancer That Expresses NY-ESO-1 Using Lymphodepleting Conditioning Followed by Infusion of Anti-NY ESO-1 Murine TCR-Gene Engineered Lymphocytes                                                                                                     | This study aimed to study the anti-tumor effect of T cell therapy by infusion of anti-NY-ESO-1 murine T-cell receptor-gene engineered lymphocytes.                                                                                                                                                                                      | HCC<br>Metastatic Liver Tumors  | NY-ESO-1                                                                                | Tumor-related Protein Coding | Anti-NY ESO-1 Murine TCR-Gene Engineered Lymphocytes | Anti-NY ESO-1 mTCR PBL<br>Cyclophosphamide Fludarabine<br>Aldesleukin | Intravenous infusion                     | 2   | 43  | Recruiting No results<br>available Estimated<br>Completion Date: July, 2028 | [162,163,164] |
| 11 | NCT02509169 | Trans-catheter Arterial p53-gene-embolization Using Gelatin Sponge Particles in Treatment of Patients with Advanced Hepatocellular Carcinoma: A Phase II Study                                                                                                                  | This study aimed to examine the effect of trans-catheter arterial embolization combined with p53 gene therapy in treatment of advanced HCC.                                                                                                                                                                                             | HCC                             | p53                                                                                     | Tumor suppressor             | Recombinant adenoviral vector                        | TAE plus P53 gene TAE                                                 | Hepatic arterial injection following TAE | 2   | 60  | Recruiting No results<br>available                                          |               |
| 12 | NCT02932956 | Glypican 3-specific Chimeric Antigen Receptor Expressed in Autologous T Cells as Immunotherapy for Patients with Pediatric Solid Tumors                                                                                                                                         | This study enrolls patients who have GPC3-positive liver cancers currently. Patients may be considered if the cancer has come back, has not gone away after standard treatment or the patient cannot receive standard treatment. This research study uses special immune system cells called GAP T cells, a new experimental treatment. | Pediatric Primary Liver Cancers | GPC-3                                                                                   | Tumor-related Protein Coding | CAR T cells                                          | GAP T cells Cytosan Fludara                                           |                                          | 1   | 18  | Recruiting No results<br>available Estimated<br>Completion Date: Feb, 2037  |               |
| 13 | NCT00012155 | A Phase I, Open-Label, Dose-Escalating Study of The Safety, Tolerability, And Anti-Tumor Activity of a Single Intrahepatic Arterial Injection of Genetically Engineered Herpes Simplex Virus, NV1020, In Subjects with Adenocarcinoma of The Colon with Metastasis to The Liver | This study aimed to examine the safety of oncolytic virus, NV1020, in patients with metastatic liver tumor of colon cancer, which showed no response to previous chemotherapy.                                                                                                                                                          | Metastatic Liver Tumors         | Oncoytic Virus                                                                          | Oncoytic Virus               | oncolytic herpes simplex virus type-1(HSV-1)         | NV1020, oncolytic herpes simplex virus type-1 (HSV-1)                 | Hepatic arterial injection               | 1   |     | Completed Results partly reported                                           | [74]          |
| 14 | NCT00066404 | A Phase I Clinical Trial of Intrapleural Adenoviral-Mediated Interferon-beta (IFN-β) Gene Transfer for Pleural Malignancies                                                                                                                                                     | This study aimed to examine the effect of genetic immunotherapy using adenoviral vector delivering interferon-beta gene into a patient with metastaic liver tumors.                                                                                                                                                                     | Metastatic Liver Tumors         | Interferon-beta                                                                         | Genetic Immunotherapy        | Adenoviral vector                                    | recombinant adenovirus-hIFN-beta                                      | Intrapleural injection                   | 1   |     | Active, not recruiting<br>Results partly reported                           | [165]         |

|    |             |                                                                                                                                                                                                                                                                                                      |                                                                                                                                                                                                     |                                                                                          |                                                   |                              |                                                                |                                                                                                     |                                               |     |     |                                                                       |           |
|----|-------------|------------------------------------------------------------------------------------------------------------------------------------------------------------------------------------------------------------------------------------------------------------------------------------------------------|-----------------------------------------------------------------------------------------------------------------------------------------------------------------------------------------------------|------------------------------------------------------------------------------------------|---------------------------------------------------|------------------------------|----------------------------------------------------------------|-----------------------------------------------------------------------------------------------------|-----------------------------------------------|-----|-----|-----------------------------------------------------------------------|-----------|
| 15 | NCT00035919 | Tumor Site Specific Phase I Evaluation of Safety of Hepatic Arterial Infusion of a Matrix-Targeted Retroviral Vector Bearing a Dominant Negative Cyclin G1 Construct as Intervention for Colorectal Carcinoma Metastatic to Liver                                                                    | This study aimed to examine the safety and anti-tumor effect of a gene therapy of dominant negative form of cyclin G1 for the metastatic liver tumors of colorectal cancer.                         | Metastatic Liver Tumors                                                                  | Dominant Negative Cyclin G1                       | Tumor suppressor             | Retroviral Vector                                              | Mx-dnG1 Retroviral Vector                                                                           | Hepatic arterial infusion                     | 1/2 | 0   | Withdrawn                                                             |           |
| 16 | NCT00005629 | Phase I/II Trial Testing Alpha Fetoprotein (AFP) Peptide Immunization in Hepatocellular Carcinoma                                                                                                                                                                                                    | This study aimed to examine the anti-tumor effect and safety of gene vaccine therapy using AFP peptide in treating patients who have HCC or metastatic liver cancers.                               | Primary Liver Cancers<br>Metastatic Liver Tumors                                         | AFP                                               | Tumor-related Protein Coding | AFP peptide                                                    | AFP gene hepatocellular carcinoma vaccine                                                           | Intradermal injection                         | 1/2 | 6   | Completed No results reported to date                                 |           |
| 17 | NCT02905188 | Glypican 3-specific Chimeric Antigen Receptor Expressing T Cells as Immunotherapy for Patients with Hepatocellular Carcinoma                                                                                                                                                                         | This study aimed to examine the effect of CAR-T cells expressing GPC-3 by ex vivo gene therapy.                                                                                                     | HCC                                                                                      | GPC-3                                             | Tumor-related Protein Coding | CAR T cells                                                    | GLYCART cells                                                                                       | Intravenous infusion                          | 1   | 14  | Recruiting No results available Estimated Completion Date: Oct, 2036  |           |
| 18 | NCT00093548 | A Phase I/II Trial Testing Immunization with AFP + GM-CSF Plasmid Prime and AFP Adenoviral Vector Boost In Patients With Hepatocellular Carcinoma (AFP Prime-Boost Protocol)                                                                                                                         | This study aimed to examine the anti-tumor effect of gene vaccines using adenoviral vector expressing AFP and GM-CSF.                                                                               | HCC                                                                                      | AFP, GM-CSF                                       | Tumor-related Protein Coding | Adenoviral vector                                              | Vaccination AFP plasmid DNA vaccine<br>GM-CSF plasmid DNA hepatocellular carcinoma vaccine adjuvant | Intramuscular injection/Intradermal injection | 1/2 | 0   | Withdrawn                                                             | [92]      |
| 19 | NCT01628640 | Phase I Trial of Intratumoral Injection of Vesicular Stomatitis Virus Expressing Human Interferon Beta in Patients with Sorafenib Refractory/Intolerant Hepatocellular Carcinoma, Advanced Solid Tumors with Liver Predominant Locally Advanced/Metastatic Disease or Subcutaneous/Cutaneous Lesions | This study aimed to examine the effect of genetic immunotherapy using viral vector expressing interferon-beta gene.                                                                                 | Primary Liver Cancers<br>Metastatic Liver Tumors                                         | Interferon-beta                                   | Genetic Immunotherapy        | Vesicular Stomatitis Virus                                     | Recombinant Vesicular Stomatitis Virus-expressing Interferon-beta                                   | Intratumoral Injection                        | 1   | 17  | Active, not recruiting Estimated Completion Date: June, 2025          |           |
| 20 | NCT03602079 | A Phase I-II, FIH Study of A166 in Locally Advanced/Metastatic Solid Tumors Expressing Human Epidermal Growth Factor Receptor 2 (HER2) or Are HER2 Amplified That Did Not Respond or Stopped Responding to Approved Therapies                                                                        | This study aimed to examine the effect of antibody drug conjugate, A166, monotherapy in HER2-expressing or amplified patients who progressed on or did not respond to available standard therapies. | HCC CCC Metastatic Liver Tumors                                                          | HER-2                                             | Tumor-related Protein Coding | Antibody Drug Conjugate (ADC)                                  | A166, an Antibody Drug Conjugate (ADC) targeting HER2 expressing cancer cells.                      | Intravenous infusion                          | 1/2 | 82  | Recruiting No results available Estimated Completion Date: May, 2021  |           |
| 21 | NCT02416466 | Phase Ib Trial of CAR-T Hepatic Artery Infusions Followed by Selective Internal Radiation Therapy (SIRT) With Yttrium-90 Sir-Spheres® for CEA-Expressing Liver Metastases                                                                                                                            | This study aimed to examine the effect of anti-CEA CAR-T cells hepatic artery infusions and yttrium-90 SIR-Spheres in patients with CEA-expressing liver metastases.                                | Metastatic Liver Tumors                                                                  | CEA                                               | Tumor-related Protein Coding | CAR-T cells                                                    | anti-CEA CAR-T cells                                                                                | Hepatic arterial infusion                     | 1   | 8   | Completed No results reported to date                                 |           |
| 22 | NCT02869217 | Phase Ib Study of TBI-1301 (NY-ESO-1 Specific TCR Gene Transduced Autologous T Lymphocytes) in Patients with Solid Tumors                                                                                                                                                                            | This study aimed to examine the anti-tumor effect and safety of TBI-1301 (NY-ESO-1 Specific TCR Gene Transduced Autologous T Lymphocytes) in patients with solid tumors.                            | NY-ESO-1 Expressing Liver Cancers in HLA-A2 Positive Patients<br>Metastatic Liver Tumors | NY-ESO-1                                          | Tumor-related Protein Coding | NY-ESO-1 Specific TCR Gene Transduced Autologous T Lymphocytes | TBI-1301 (NY-ESO-1 Specific TCR Gene Transduced Autologous T Lymphocytes)<br>Cyclophosphamide       | Infusion                                      | 1   | 15  | Recruiting No results available Estimated Completion Date: June, 2020 |           |
| 23 | NCT01061840 | Phase I Trial of Bi-shRNAfurin and GMCSF Augmented Autologous Tumor Cell Vaccine for Advanced Cancer                                                                                                                                                                                                 | This study aimed to examine the anti-tumor effect of autologous Vigil™ vaccine expressing granulocyte macrophage colony stimulating factor and bi-shRNAfurin from the Vigil™ plasmid.               | Primary Liver Cancers<br>Metastatic Liver Tumors                                         | rhGMCSF and bi-shRNAfurin from the Vigil™ plasmid | Tumor-related Protein Coding | plasmid                                                        | Vaccination                                                                                         | Intradermal injection                         | 1   | 100 | Completed Results partly reported                                     | [166,167] |
| 24 | NCT01437007 | A Phase 1 Dose Escalation Study of Hepatic Intra-Arterial Administration of TKM 080301 (Lipid Nanoparticles                                                                                                                                                                                          | This study aimed to test the safety and effectiveness of TKM 080301 (lipid nanoparticles containing siRNA against the PLK1 gene                                                                     | Metastatic Liver Tumors from Colorectal,                                                 | siRNA Against the PLK1                            | Oncogene suppression         | Lipid Nanoparticles                                            | TKM-080301                                                                                          | Hepatic arterial infusion                     | 1   | 1   | Completed Results partly reported                                     | [53]      |

|    |             |                                                                                                                                                                                               |                                                                                                                                                                                                                                                               |                                                                                         |                |                              |                               |                                            |                                           |     |     |                                                                         |      |
|----|-------------|-----------------------------------------------------------------------------------------------------------------------------------------------------------------------------------------------|---------------------------------------------------------------------------------------------------------------------------------------------------------------------------------------------------------------------------------------------------------------|-----------------------------------------------------------------------------------------|----------------|------------------------------|-------------------------------|--------------------------------------------|-------------------------------------------|-----|-----|-------------------------------------------------------------------------|------|
|    |             | Containing siRNA Against the PLK1 Gene Product) in Patients With Colorectal, Pancreas, Gastric, Breast, Ovarian and Esophageal Cancers With Hepatic                                           | product) for cancer in the liver that has not responded to standard treatments.                                                                                                                                                                               | Pancreas, Gastric, Breast, and Ovarian Cancers                                          |                |                              |                               |                                            |                                           |     |     |                                                                         |      |
| 25 | NCT03971747 | A Phase 1 Study of AFP Specific T Cell Receptor Transduced T Cells Injection in Unresectable Hepatocellular Carcinoma                                                                         | This study aimed to assess the safety and anti-tumor activity of C-TCR055 (AFP Specific T Cell Receptor Transduced T Cells Injection) injection in unresectable HCC patients.                                                                                 | HCC                                                                                     | AFP            | Tumor-related Protein Coding | T Cell                        | AFP Specific T Cell Receptor T Cells       | Intravenous infusion                      | 1   | 9   | Not yet recruiting                                                      |      |
| 26 | NCT02418988 | Multicenter, Open-labeled, Controlled Phase II Study: Trans-catheter Chemo-embolization Combined With rAd-p53 Gene Injection in Treatment of Advanced Hepatocellular Carcinoma                | This study aimed to investigate the efficacy and safety usingTAE plus recombinant adenoviral human p53 gene (rAd-p53) in treatment of advanced HCC.                                                                                                           | HCC                                                                                     | p53            | Tumor suppressor             | Recombinant adenoviral vector | TACE plus rAd-p53 artery injection<br>TACE | Injected into the embolization artery.    | 2   | 120 | Recruiting No results available                                         |      |
| 27 | NCT02850536 | Phase Ib Trial of CAR-T Hepatic Artery Infusions or Pancreatic Venous Infusions Delivered with the Surefire Infusion System (SIS) for CEA-Expressing Liver Metastases or Pancreas Cancer      | This study aimed to examine the safety and anti-tumor effect of anti-CEA CAR-T cell infusions delivered via the hepatic artery or splenic vein using the Surefire Infusion System (SIS) for patients with CEA-expressing liver metastases or pancreas cancer. | Metastatic Liver Tumors from Colorectal, Pancreas, Gastric, Breast, and Ovarian Cancers | CEA            | Tumor-related Protein Coding | CAR-T cells                   | anti-CEA CAR-T cells                       | Hepatic arterial infusion or splenic vein | 1   | 5   | Active, not recruiting<br>Estimated Completion<br>Date: Dec, 2019       |      |
| 28 | NCT01373047 | Phase I Trial of Intrahepatic Infusion Of 2nd Generation Designer T Cells for Cea-Expressing Liver Metastases                                                                                 | The study aimed to collect data on the safety and potential effectiveness of 2nd generation designer T cells delivered into the hepatic circulation in patients with liver metastases expressing the CEA tumor marker.                                        | Metastatic Liver Tumors from Colorectal, Pancreas, Gastric, Breast, and Ovarian Cancers | CEA            | Tumor-related Protein Coding | T cell                        | anti-CEA 2nd generation designer T cells   | Hepatic arterial infusion or splenic vein | 1   | 8   | Completed No results reported to date                                   |      |
| 29 | NCT02432963 | A Phase I Study of a p53MVA Vaccine in Combination with Pembrolizumab                                                                                                                         | This study aimed to examine the anti-tumor effect of genetic vaccines made from a gene-modified virus combined with pembrolizumab.                                                                                                                            | Adult Solid Neoplasm                                                                    | p53            | Tumor suppressor             | Modified vaccinia virus       | Vaccination                                |                                           | 1   | 19  | Active, not recruiting<br>Estimated Completion<br>Date: Feb, 2020       |      |
| 30 | NCT02715362 | An Open-label, Uncontrolled, Single-arm Pilot Study to Evaluate Vascular Interventional Therapy Mediated GPC3-targeted Chimeric Antigen Receptor T Cells in Advanced Hepatocellular Carcinoma | This study aimed to examine the effect of CAR-T cells in the treatment of solid tumors by transcatheter arterial infusion, which is one kind of tumor intervention therapy pathway.                                                                           | HCC                                                                                     | GPC3           | Tumor-related Protein Coding | CAR-T cells                   | TAI-GPC3-CART cells                        | Hepatic arterial infusion                 | 1/2 | 30  | Recruiting No results available                                         |      |
| 31 | NCT00301106 | Phase I Trial of Adenoviral Vector Delivery of the Human Interleukin-12 cDNA by Intratumoral Injection in Patients with Metastatic Breast Cancer to the Liver                                 | This study aimed to examine the side effects and best dose of a gene-modified virus that can make interleukin-12 in treating women with metastatic liver tumors from breast cancer.                                                                           | Metastatic Liver Tumors from Colorectal, Pancreas, Gastric, Breast, and Ovarian Cancers | Interleukin-12 | Genetic Immunotherapy        | Adenoviral Vector             | adenovirus-mediated human interleukin-12   | Intratumoral Injection                    | 1   | 2   | Terminated No results available                                         |      |
| 32 | NCT00072098 | Phase I Trial of Adenoviral Vector Delivery of The Human Interleukin-12 cDNA By Intratumoral Injection in Patients with Metastatic Colorectal Cancer to The Liver                             | This study aimed to examine the safety and anti-tumor effect of interleukin-12 gene when injected into the tumors of patients with liver metastases from colorectal cancer.                                                                                   | Metastatic Liver Tumors from Colorectal, Pancreas, Gastric, Breast, and Ovarian Cancers | Interleukin-12 | Genetic Immunotherapy        | Adenoviral Vector             | adenoviral vector-delivered interleukin-12 | Intratumoral Injection                    | 1   | 22  | Terminated No results available                                         |      |
| 33 | NCT03198546 | CAR-T Cell Targeting GPC3 for Immunotherapy of Hepatocellular Carcinoma: Phase I Clinical Trial                                                                                               | The study aimed to examine the safety, tolerance, and preliminary efficacy of the GPC3-T2-CAR-T cell immunotherapy in human HCC patients with GPC3 expression.                                                                                                | HCC                                                                                     | GPC3           | Tumor-related Protein Coding | CAR-T cells                   | GPC3 targeting CAR-T cells                 | Systemic or local injections              | 1   | 30  | Recruiting No results available<br>Estimated Completion Date: Aug, 2022 | [87] |

|    |             |                                                                                                                                                                                                       |                                                                                                                                                                                                                                                                       |                                                                                         |                                                                                                                     |                              |                            |             |  |   |    |                             |      |
|----|-------------|-------------------------------------------------------------------------------------------------------------------------------------------------------------------------------------------------------|-----------------------------------------------------------------------------------------------------------------------------------------------------------------------------------------------------------------------------------------------------------------------|-----------------------------------------------------------------------------------------|---------------------------------------------------------------------------------------------------------------------|------------------------------|----------------------------|-------------|--|---|----|-----------------------------|------|
| 34 | NCT00103142 | A Phase II Study of Active Immunotherapy with PANVAC or Autologous, Cultured Dendritic Cells Infected with PANVAC After Complete Resection of Hepatic or Pulmonary Metastases of Colorectal Carcinoma | This study aimed to examine the effect of gene vaccine therapy together with dendritic cells, how well it works compared to giving vaccine therapy together with GM-CSF in treating patients with liver or lung metastases from colorectal cancer removed by surgery. | Metastatic Liver Tumors from Colorectal, Pancreas, Gastric, Breast, and Ovarian Cancers | Vaccinia-Carcinoembryonic antigen (CEA)-mucin 1 (MUC-1)- Triad of costimulatory molecules TRICOM vaccine (PANVAC-V) | Tumor-related Protein Coding | Autologous dendritic cells | Vaccination |  | 2 | 74 | Completed Results available | [95] |
|----|-------------|-------------------------------------------------------------------------------------------------------------------------------------------------------------------------------------------------------|-----------------------------------------------------------------------------------------------------------------------------------------------------------------------------------------------------------------------------------------------------------------------|-----------------------------------------------------------------------------------------|---------------------------------------------------------------------------------------------------------------------|------------------------------|----------------------------|-------------|--|---|----|-----------------------------|------|

CC, hepatocellular carcinoma; CCC, cholangiocellular carcinoma; TACE, transarterial chemoembolization; TAE, transarterial embolization; SVtk, thymidine kinase of herpes simplex virus; NY -ESO-1, New York esophageal squamous cell carcinoma 1; GPC-3, Glypican-3; LT, liver transplantation
